# Supplementary material for: Acute Effects of Turmeric Extracts on Knee Joint Pain: A Pilot, Randomized Controlled Trial
Source: PubMed Central journal article supplement (PMC8080919; doi:10.1089/jmf.2020.0074), 2021-04-16
Supplement: Supp_Table2.pdf [file Supp_Table2.pdf]

SUPPLEMENTARY TABLE S2. CHANGES IN ANTHROPOMETRIC AND ROUTINE BIOCHEMICAL PARAMETERS ONE WEEK AFTER THE INTERVENTION

|                              | <i>Intervention</i>         |                             |                             |                             | <i>Comparison of changes</i>     |          |
|------------------------------|-----------------------------|-----------------------------|-----------------------------|-----------------------------|----------------------------------|----------|
|                              | <i>Placebo (n=33)</i>       |                             | <i>B-TURMACTIVE® (n=35)</i> |                             | <i>B-TURMACTIVE® vs. placebo</i> |          |
|                              | <i>Post-int (Mean ± SD)</i> | <i>Change Mean (95% CI)</i> | <i>Post-int (Mean ± SD)</i> | <i>Change Mean (95% CI)</i> | <i>Mean (95% CI)</i>             | <i>P</i> |
| Weight, kg                   | 72.6 ± 13.4                 | -0.117 (-0.31 to 0.08)      | 69.5 ± 10.2                 | -0.082 (-0.27 to 0.11)      | 0.035 (-0.24 to 0.31)            | .803     |
| BMI, kg/m <sup>2</sup>       | 25.3 ± 3.69                 | -0.042 (-0.11 to 0.03)      | 24.7 ± 2.87                 | -0.029 (-0.09 to 0.04)      | 0.013 (-0.08 to 0.11)            | .793     |
| Waist circumference, cm      | 88.4 ± 12.2                 | -0.014 (-0.46 to 0.49)      | 86.6 ± 10.2                 | 0.275 (-0.20 to 0.76)       | 0.261 (-0.42 to 0.94)            | .443     |
| Waist/height                 | 0.52 ± 0.07                 | 0.000 (-0.003 to 0.003)     | 0.52 ± 0.06                 | 0.002 (-0.001 to 0.005)     | 0.002 (-0.002 to 0.006)          | .437     |
| Conicity index               | 1.24 ± 0.09                 | -0.001 (-0.006 to 0.008)    | 1.23 ± 0.09                 | 0.005 (-0.02 to 0.01)       | 0.004 (-0.006 to 0.01)           | .412     |
| Physical activity, AU (log)  | 0.52 ± 0.10                 | 0.053 (-0.00 to 0.11)       | 0.52 ± 0.08                 | 0.043 (-0.00 to 0.01)       | -0.010 (-0.08 to 0.06)           | .786     |
| Glucose, mg/dL               | 86.4 ± 8.68                 | 0.136 (-2.2 to 2.5)         | 83.6 ± 6.82                 | 1.186 (-1.1 to 3.4)         | 1.051 (-2.2 to 4.3)              | .524     |
| Total Cholesterol, mg/dL     | 192 ± 27.5                  | 2.23 (-2.9 to 7.4)          | 186 ± 35.8                  | -4.10 (-9.1 to 0.93)        | -6.33 (-13.6 to 0.93)            | .086     |
| Triglycerides, mg/dL         | 86.7 ± 34.6                 | 0.706 (-7.9 to 9.3)         | 85.6 ± 38.5                 | -6.04 (-14.4 to 2.3)        | -6.74 (-18.8 to 5.3)             | .270     |
| Alanine transaminase, UI/L   | 15.4 ± 5.34                 | -0.555 (-2.0 to 0.90)       | 18.1 ± 9.13                 | -1.16 (-2.6 to 0.25)        | -0.607 (-2.6 to 1.4)             | .553     |
| Aspartate transaminase, UI/L | 17.9 ± 4.19                 | 0.142 (-1.1 to 1.4)         | 19.7 ± 6.34                 | 0.066 (-1.2 to 1.3)         | -0.076 (-1.8 to 1.7)             | .931     |

ANCOVA model adjusted by sex and age.

Post-int, postintervention; 95% CI, confidence interval at 95%; ANCOVA, analysis of covariance.
