# Supplementary material for: Acute Effects of Turmeric Extracts on Knee Joint Pain: A Pilot, Randomized Controlled Trial
Source: PubMed Central journal article supplement (PMC8080919; doi:10.1089/jmf.2020.0074), 2021-04-16
Supplement: Supp_Table3.pdf [file Supp_Table3.pdf]

SUPPLEMENTARY TABLE S3. SUPPLEMENTARY CONSORT 2010 CHECKLIST

| <i>Section/topic</i>                                 | <i>Item no.</i> | <i>Checklist item</i>                                                                                                                                                                       | <i>Reported on page no.</i>        |
|------------------------------------------------------|-----------------|---------------------------------------------------------------------------------------------------------------------------------------------------------------------------------------------|------------------------------------|
| Title and abstract                                   | 1a              | Identification as a randomized trial in the title                                                                                                                                           | 1                                  |
|                                                      | 1b              | Structured summary of trial design, methods, results, and conclusions (for specific guidance, see CONSORT for abstracts)                                                                    | 3                                  |
| Introduction                                         |                 |                                                                                                                                                                                             |                                    |
| Background                                           | 2a              | Scientific background and explanation of rationale                                                                                                                                          | 4                                  |
| and objectives                                       | 2b              | Specific objectives or hypotheses                                                                                                                                                           | 4                                  |
| Methods                                              |                 |                                                                                                                                                                                             |                                    |
| Trial design                                         | 3a              | Description of trial design (such as parallel and factorial), including the allocation ratio                                                                                                | 5                                  |
|                                                      | 3b              | Important changes to methods after trial commencement (such as eligibility criteria), with reasons                                                                                          | -                                  |
| Participants                                         | 4a              | Eligibility criteria for participants                                                                                                                                                       | 5                                  |
|                                                      | 4b              | Settings and locations where the data were collected                                                                                                                                        | 5                                  |
| Interventions                                        | 5               | The interventions for each group with sufficient details to allow replication, including how and when they were actually administered                                                       | 5–6                                |
| Outcomes                                             | 6a              | Completely defined prespecified primary and secondary outcome measures, including how and when they were assessed                                                                           | 6–7                                |
|                                                      | 6b              | Any changes to trial outcomes after the trial commenced, with reasons                                                                                                                       | -                                  |
| Sample size                                          | 7a              | How sample size was determined                                                                                                                                                              | 7                                  |
|                                                      | 7b              | When applicable, explanation of any interim analyses and stopping guidelines                                                                                                                | -                                  |
| Randomization:                                       |                 |                                                                                                                                                                                             |                                    |
| Sequence generation                                  | 8a              | Method used to generate the random allocation sequence                                                                                                                                      | 5–6                                |
|                                                      | 8b              | Type of randomization; details of any restriction (such as blocking and block size)                                                                                                         | 5                                  |
| Allocation concealment mechanism                     | 9               | Mechanism used to implement the random allocation sequence (such as sequentially numbered containers), describing any steps taken to conceal the sequence until interventions were assigned | 6                                  |
| Implementation                                       | 10              | Who generated the random allocation sequence, who enrolled participants, and who assigned participants to interventions                                                                     | 6                                  |
| Blinding                                             | 11a             | If done, who was blinded after assignment to interventions (for example, participants, care providers, and those assessing outcomes) and how                                                | 6                                  |
|                                                      | 11b             | If relevant, description of the similarity of interventions                                                                                                                                 | 6                                  |
| Statistical methods                                  | 12a             | Statistical methods used to compare groups for primary and secondary outcomes                                                                                                               | 7                                  |
|                                                      | 12b             | Methods for additional analyses, such as subgroup analyses and adjusted analyses                                                                                                            | 7                                  |
| Results                                              |                 |                                                                                                                                                                                             |                                    |
| Participant flow (a diagram is strongly recommended) | 13a             | For each group, the numbers of participants who were randomly assigned, received intended treatment, and were analyzed for the primary outcome                                              | 7                                  |
|                                                      | 13b             | For each group, losses and exclusions after randomization, together with reasons                                                                                                            | 7                                  |
| Recruitment                                          | 14a             | Dates defining the periods of recruitment and follow-up                                                                                                                                     | 4–5                                |
|                                                      | 14b             | Why the trial ended or was stopped                                                                                                                                                          | -                                  |
| Baseline data                                        | 15              | A table showing baseline demographic and clinical characteristics for each group                                                                                                            | 7 and Supplementary Tables 1 and 2 |
| Numbers analyzed                                     | 16              | For each group, the number of participants (denominator) included in each analysis and whether the analysis was by original assigned groups                                                 | 7                                  |
| Outcomes and estimation                              | 17a             | For each primary and secondary outcome, results for each group and the estimated effect size and its precision (such as 95% confidence interval)                                            | 7–8                                |
|                                                      | 17b             | For binary outcomes, presentation of both absolute and relative effect sizes is recommended                                                                                                 | -                                  |
| Ancillary analyses                                   | 18              | Results of any other analyses performed, including subgroup analyses and adjusted analyses, distinguishing prespecified from exploratory results                                            | -                                  |
| Harms                                                | 19              | All important harmful or unintended effects in each group (for specific guidance, see CONSORT for harmful effects)                                                                          | 7                                  |
| Discussion                                           |                 |                                                                                                                                                                                             |                                    |
| Limitations                                          | 20              | Trial limitations, addressing sources of potential bias, imprecision, and, if relevant, multiplicity of analyses                                                                            | 9                                  |
| Generalizability                                     | 21              | Generalizability (external validity and applicability) of the trial findings                                                                                                                | 10                                 |
| Interpretation                                       | 22              | Interpretation consistent with results, balancing benefits and harm, and considering other relevant evidence                                                                                | 8–9                                |
| Other information                                    |                 |                                                                                                                                                                                             |                                    |
| Registration                                         | 23              | Registration number and name of trial registry                                                                                                                                              | 5                                  |
| Protocol                                             | 24              | Where the full trial protocol can be accessed if available                                                                                                                                  | 5                                  |
| Funding                                              | 25              | Sources of funding and other support (such as supply of drugs) and role of funders                                                                                                          | 11                                 |
